# Supplementary material for: Structural Analysis of Janus Tyrosine Kinase Variants in Hematological Malignancies: Implications for Drug Development and Opportunities for Novel Therapeutic Strategies
Source: MDPI journal article supplement (doi:10.3390/ijms241914573), 2023-09-26
Supplement: s1 [file s1]

**Table S1.** Human JAK Family functional domain regions

| JAK        | UniProtKD Entry | FERM Domain | SH2 Domain | Pseudokinase Domain | Kinase Domain |
|------------|-----------------|-------------|------------|---------------------|---------------|
| JAK1_HUMAN | P23458          | 34-420      | 439-544    | 583-855             | 875-1153      |
| JAK2_HUMAN | O60674          | 37-380      | 401-482    | 545-809             | 849-1124      |
| JAK3_HUMAN | P52333          | 24-356      | 375-475    | 521-781             | 822-1111      |
| TYK2_HUMAN | P29597          | 26-431      | 437-534    | 589-867             | 892-1174      |

**Table S2.** Post-translation modification of JAK proteins

| Post-translation modification    | JAK1                            | JAK2                                                   | JAK3                                                                                      | TYK2                                 |
|----------------------------------|---------------------------------|--------------------------------------------------------|-------------------------------------------------------------------------------------------|--------------------------------------|
| Phosphotyrosine                  | Y3, Y1034, Y1035, Y1125         | Y119, Y373, Y570, Y813, Y868, Y966, Y972, Y1007, Y1008 | Y105, Y190, Y238, Y399, Y633, Y637, Y738, Y762, Y785, Y824, Y904, Y929, Y939, Y980, Y981, | Y292, Y433, Y604, Y827, Y1054, Y1055 |
| Phosphotyrosine by autocatalysis | -                               | Y119, Y868, Y966, Y972, Y1007, Y1008                   | Y105, Y190, Y238, Y399, Y633, Y637, Y738, Y762, Y785, Y824, Y904, Y929, Y939, Y980, Y981  | Y1054                                |
| Phosphoserine                    | S228, S537, S857, S963          | S523                                                   | S17, S20, S493, S783                                                                      | S499, S525, S613, S884               |
| Others                           | N-acetylmethionine in residue 1 | -                                                      | -                                                                                         | Phospho-T879                         |

**Table S3:** Full list of known JAK hematological malignancy variants. Acute lymphoblastic leukemia (ALL); Early T-cell precursor (ETP); Acute myeloid leukemia (AML); Polycythemia vera (PV); Myeloproliferative neoplasm (MPN); Essential thrombocythaemia (ET); Acute megakaryoblastic leukemia (AMKL); Adult T-cell leukemia/lymphoma (ATLL); T-cell pro-lymphocytic leukemia (T-PLL); Juvenile myelomonocytic leukemia (JMML); Natural killer/T-cell lymphoma (NKTCL); Idiopathic myelofibrosis (IMF); Down syndrome ALL (DS-ALL); Down syndrome therapy-related myelodysplastic syndrome (DS-TMD)

| JAK1 | Region | Original Amino acid     | Position | Amino acid Change | Original Amino acid nature | New Amino acid nature | Hematopoietic Malignancy Subtype | Reference                                                      |
|------|--------|-------------------------|----------|-------------------|----------------------------|-----------------------|----------------------------------|----------------------------------------------------------------|
|      | FERM   | I                       | 62       | V                 | Nonpolar                   | Nonpolar              | B-ALL; T-ALL                     | PMID: 18362173                                                 |
|      |        | S                       | 71       | C                 | Polar                      | Polar                 | ETP-ALL                          | PMID: 23603912                                                 |
|      |        | K                       | 204      | M                 | Positive                   | Nonpolar              | B-ALL                            | PMID: 24154688                                                 |
|      |        | R                       | 360      | W                 | Positive                   | Nonpolar              | T-ALL                            | PMID: 18362173                                                 |
|      | Linker | I                       | 377      | K                 | Nonpolar                   | Positive              | ETP-ALL                          | PMID: 23603912                                                 |
|      |        | V                       | 427      | M                 | Nonpolar                   | Nonpolar              | Pediatric T-ALL                  | PMID: 26819051                                                 |
|      | SH2    | T                       | 478      | S                 | Polar                      | Polar                 | AML                              | PMID: 24843152                                                 |
|      |        | S                       | 512      | L                 | Polar                      | Nonpolar              | T-ALL                            | PMID: 18362173                                                 |
|      |        | D                       | 604      | Y                 | Negative                   | Nonpolar              | T-ALL                            | PMID: 21880637                                                 |
|      |        | V                       | 623      | A                 | Nonpolar                   | Nonpolar              | AML                              | PMID: 24843152                                                 |
|      | JH2    | L624-629W (L624_R629>W) |          |                   | indel*                     |                       | ALL                              | PMID: 25504635,                                                |
|      |        | I                       | 631      | R                 | Nonpolar                   | Positive              | ALL                              | PMID: 22237106                                                 |
|      |        | I                       | 631      | G                 | Nonpolar                   | Nonpolar              | ALL                              | PMID: 22237106                                                 |
|      |        | A                       | 634      | D                 | Nonpolar                   | Negative              | B-ALL; T-ALL                     | PMID: 18362173                                                 |
|      |        | S                       | 646      | F                 | Polar                      | Nonpolar              | ALL                              | PMID: 25504635                                                 |
|      |        | S                       | 646      | P                 | Polar                      | Nonpolar              | ALL                              | PMID: 21393331                                                 |
|      |        | K                       | 648      | N                 | Positive                   | Polar                 | T-ALL                            | PMID: 21551237                                                 |
|      |        | V                       | 651      | M                 | Nonpolar                   | Nonpolar              | T-ALL                            | PMID: 24843152                                                 |
|      |        | Y                       | 652      | H                 | Nonpolar                   | Positive              | T-ALL                            | PMID: 24843152, PMID: 21393331                                 |
|      |        | L                       | 653      | F                 | Nonpolar                   | Nonpolar              | Childhood ALL                    | PMID: 18362173                                                 |
|      |        | V                       | 658      | F                 | Nonpolar                   | Nonpolar              | ALL                              | PMID: 25504635, PMID: 21393331, PMID: 18559588, PMID: 16239216 |
|      |        | V                       | 658      | L                 | Nonpolar                   | Nonpolar              | ALL                              | PMID: 21393331                                                 |
|      |        | E                       | 668      | Q                 | Negative                   | Polar                 | Pediatric T-ALL                  | PMID: 26819051                                                 |
|      |        | S                       | 703      | I                 | Polar                      | Nonpolar              | ALL                              | PMID: 22237106, PMID: 21393331                                 |
|      |        | R                       | 724      | H                 | Positive                   | Positive              | B-ALL; T-ALL                     | PMID: 18362173                                                 |
|      |        | R                       | 724      | Q                 | Positive                   | Polar                 | B-ALL; T-ALL                     | PMID: 18362173                                                 |
|      |        | R                       | 724      | S                 | Positive                   | Polar                 | B-ALL; T-ALL                     | PMID: 18362173                                                 |
|      |        | F                       | 734      | L                 | Nonpolar                   | Nonpolar              | T-ALL                            | PMID: 21393331                                                 |
|      |        | L                       | 783      | F                 | Nonpolar                   | Nonpolar              | T-ALL                            | PMID: 21393331, PMID: 18559588                                 |
|      | JH1    | R                       | 879      | S                 | Positive                   | Polar                 | T-ALL                            | PMID: 18362173                                                 |
|      |        | R                       | 879      | C                 | Positive                   | Polar                 | T-ALL                            | PMID: 18362173                                                 |

|      |        | R                   | 879      | H                 | Positive                   | Positive              | T-ALL                                                   | PMID: 18362173                                                 |
|------|--------|---------------------|----------|-------------------|----------------------------|-----------------------|---------------------------------------------------------|----------------------------------------------------------------|
|      |        | T                   | 901      | G                 | Polar                      | Nonpolar              | T-ALL                                                   | PMID: 26819051                                                 |
|      |        | K                   | 908      | T                 | Positive                   | Polar                 | Pediatric T-ALL                                         | PMID: 26819051                                                 |
| JAK2 | Region | Original Amino acid | Position | Amino acid Change | Original Amino acid nature | New Amino acid nature | Hematopoietic Malignancy Subtype                        | Reference                                                      |
|      |        | E                   | 61       | K                 | Negative                   | Positive              | Putative primary erythrocytosis                         | PMID: 27651169                                                 |
|      |        | T                   | 108      | A                 | Polar                      | Nonpolar              | Found as germline mutation in V617F-positive PV patient | PMID: 27647865                                                 |
|      | FERM   | E                   | 177      | V                 | Negative                   | Nonpolar              | Putative primary erythrocytosis                         | PMID: 27651169                                                 |
|      |        | G                   | 276      | A                 | Nonpolar                   | Nonpolar              | Putative primary erythrocytosis                         | PMID: 27651169                                                 |
|      |        | R                   | 340      | Q                 | Positive                   | Polar                 | PV                                                      | PMID: 20417861                                                 |
|      | Linker | L                   | 393      | V                 | Nonpolar                   | Nonpolar              | Found as germline mutation in V617F-positive PV patient | PMID: 27647865                                                 |
|      |        | T                   | 514      | M                 | Polar                      | Nonpolar              | MPNs                                                    | PMID: 19074595                                                 |
|      |        | N                   | 533      | I                 | Polar                      | Nonpolar              | PV (together with K539L)                                | PMID: 21864276                                                 |
|      |        | N                   | 533      | Y                 | Polar                      | Nonpolar              | PV (together with K539L)                                | PMID: 21864276                                                 |
|      |        | M                   | 535      | I                 | Nonpolar                   | Nonpolar              | AMKL                                                    | PMID: 19638629                                                 |
|      | Linker | K                   | 539      | L                 | Positive                   | Nonpolar              | MPNs                                                    | PMID: 17267906                                                 |
|      |        | I                   | 540      | T                 | Nonpolar                   | Polar                 | PV                                                      | PMID: 24843152                                                 |
|      |        |                     | 538-547  |                   |                            |                       | MPNs                                                    | PMID: 24843152                                                 |
|      |        | D                   | 544      | G                 | Negative                   | Nonpolar              | PV                                                      | PMID: 24843152                                                 |
|      |        | L                   | 545      | S                 | Nonpolar                   | Polar                 | PV                                                      | PMID: 24843152                                                 |
|      |        | F                   | 547      | L                 | Nonpolar                   | Nonpolar              | PV                                                      | PMID: 24843152                                                 |
|      |        | F                   | 556      | L                 | Nonpolar                   | Nonpolar              | MPNs                                                    | PMID: 21864276                                                 |
|      |        | R                   | 564      | Q                 | Positive                   | Polar                 | Hereditary ET                                           | PMID: 24381227                                                 |
|      |        | V                   | 567      | A                 | Nonpolar                   | Nonpolar              | MPNs                                                    | PMID: 21864276                                                 |
|      |        | H                   | 587      | N                 | Positive                   | Polar                 | MPNs                                                    | PMID: 21864276                                                 |
|      |        | S                   | 591      | L                 | Polar                      | Nonpolar              | MPNs                                                    | PMID: 21864276                                                 |
|      |        | H                   | 606      | Q                 | Positive                   | Polar                 | MPNs                                                    | PMID: 21864276                                                 |
|      |        | K                   | 607      | N                 | Positive                   | Polar                 | AML                                                     | PMID: 21864276                                                 |
|      |        | H                   | 608      | Y                 | Positive                   | Nonpolar              | MPNs                                                    | PMID: 21864276                                                 |
|      | JH2    | L                   | 611      | S                 | Nonpolar                   | Polar                 | ALL                                                     | PMID: 21864276                                                 |
|      |        | V                   | 617      | F                 | Nonpolar                   | Nonpolar              | MPNs                                                    | PMID: 15781101, PMID: 15793561, PMID: 15858187, PMID: 15837627 |
|      |        | V                   | 617      | I                 | Nonpolar                   | Nonpolar              | Hereditary thrombocythemia                              | PMID: 22397670, PMID: 23535062                                 |
|      |        | C                   | 618      | R                 | Polar                      | Positive              | MPNs                                                    | PMID: 22960131                                                 |
|      |        | D                   | 620      | E                 | Negative                   | Negative              | MPNs                                                    | PMID: 16871281                                                 |
|      |        | L                   | 624      | P                 | Nonpolar                   | Nonpolar              | MPNs                                                    | PMID: 21864276                                                 |
|      |        | I                   | 645      | V                 | Nonpolar                   | Nonpolar              | MPNs                                                    | PMID: 21864276                                                 |
|      |        | I                   | 682      | F                 | Nonpolar                   | Nonpolar              | ALL                                                     | PMID: 19470474                                                 |
|      |        | R                   | 683      | S                 | Positive                   | Polar                 | MPNs                                                    | PMID: 19470474, PMID: 18805579                                 |
|      |        | R                   | 683      | G                 | Positive                   | Nonpolar              | MPNs                                                    | PMID: 19470474, PMID: 18805579                                 |

|      |        | S                      | 755      | R                    | Polar                            | Positive                 | Hereditary thrombocythemia<br>(together with R938Q in cis)                 | PMID: 24398328                                       |
|------|--------|------------------------|----------|----------------------|----------------------------------|--------------------------|----------------------------------------------------------------------------|------------------------------------------------------|
|      |        | Y                      | 813      | D                    | Nonpolar                         | Negative                 | IMF                                                                        | PMID: 24843152                                       |
|      | Linker | E                      | 846      | D                    | Negative                         | Negative                 | Germ-line mutation found in<br>erythrocytosis and megakaryocytic<br>atypia | PMID: 27389715                                       |
|      |        | R                      | 867      | Q                    | Positive                         | Polar                    | ALL, hereditary thrombocythemia                                            | PMID: 25504635                                       |
|      |        | D                      | 873      | N                    | Negative                         | Polar                    | ALL                                                                        | PMID: 19470474                                       |
|      |        | T                      | 875      | N                    | Polar                            | Polar                    | AMKL                                                                       | PMID: 24843152                                       |
|      | JH1    | P                      | 933      | R                    | Nonpolar                         | Positive                 | ALL                                                                        | PMID: 19470474                                       |
|      |        | R                      | 938      | Q                    | Positive                         | Polar                    | Hereditary thrombocythemia<br>(together with S755R in cis)                 | PMID: 24398328                                       |
|      |        | R                      | 1063     | H                    | Positive                         | Positive                 | Germ-line mutation found in<br>erythrocytosis and megakaryocytic<br>atypia | PMID: 27389715                                       |
|      |        | N                      | 1108     | S                    | Polar                            | Polar                    | PV                                                                         | PMID: 24843152                                       |
| JAK3 | Region | Original<br>Amino acid | Position | Amino acid<br>Change | Original<br>Amino acid<br>nature | New Amino acid<br>nature | Leukemia Subtype                                                           | Reference                                            |
|      |        | G                      | 62       | S                    | Nonpolar                         | Polar                    | AML                                                                        | PMID: 20400977                                       |
|      |        | I                      | 87       | T                    | Nonpolar                         | Polar                    | DS-TMD/AML                                                                 | PMID: 14615376,<br>PMID: 18397343                    |
|      |        | P                      | 132      | T                    | Nonpolar                         | Polar                    | AMKL                                                                       | PMID: 16843266,<br>PMID: 21599579                    |
|      |        | P                      | 132      | A                    | Nonpolar                         | Nonpolar                 | AMKL                                                                       | PMID: 16843266,<br>PMID: 21599579                    |
|      | FERM   | P                      | 151      | R                    | Nonpolar                         | Positive                 | DS-TMD, AMLK                                                               | PMID: 11668610,<br>PMID: 17456055                    |
|      |        | L                      | 156      | P                    | Nonpolar                         | Nonpolar                 | ATLL                                                                       | PMID: 21821710                                       |
|      |        | R                      | 172      | Q                    | Positive                         | Polar                    | ATLL                                                                       | PMID: 21821710                                       |
|      |        | E                      | 183      | G                    | Negative                         | Nonpolar                 | ATLL                                                                       | PMID: 21821710                                       |
|      |        | R                      | 272      | H                    | Positive                         | Positive                 | T-ALL                                                                      | PMID: 25193870                                       |
|      |        | Q                      | 283      | H                    | Polar                            | Positive                 | T-ALL                                                                      | PMID: 26206799                                       |
|      | SH2    | R                      | 403      | H                    | Positive                         | Positive                 | T-ALL                                                                      | PMID: 25193870,<br>PMID: 9354668                     |
|      |        | Q                      | 501      | H                    | Polar                            | Positive                 | AMKL                                                                       | PMID: 24843152,<br>PMID: 18397343                    |
|      | Linker | Q                      | 507      | P                    | Polar                            | Nonpolar                 | T-PLL                                                                      | PMID: 24446122                                       |
|      |        | M                      | 511      | I                    | Nonpolar                         | Nonpolar                 | T-PLL, AML, JMML, NKTCL                                                    | PMID: 25193870,<br>PMID: 24446122                    |
|      |        | A                      | 572      | V                    | Nonpolar                         | Nonpolar                 | AMKL                                                                       | PMID: 24843152,<br>PMID: 25193870                    |
|      |        | A                      | 572      | T                    | Nonpolar                         | Polar                    | AMKL                                                                       | PMID: 24843152,<br>PMID: 25193870,<br>PMID: 24843152 |
|      |        | A                      | 573      | V                    | Nonpolar                         | Nonpolar                 | DS-ALL, DS AMKL, NTCL                                                      | PMID: 19139084,<br>PMID: 29046866,<br>PMID: 28284718 |
|      |        | M                      | 576      | L                    | Nonpolar                         | Nonpolar                 | Adult non-DS AMKL                                                          | PMID: 17252020                                       |
|      |        | H                      | 583      | Y                    | Positive                         | Nonpolar                 | NTCL                                                                       | PMID: 14615376,<br>PMID: 28284718                    |
|      | JH2    | G                      | 589      | D                    | Nonpolar                         | Negative                 | NTCL                                                                       | PMID: 28284718                                       |
|      |        |                        | 592      |                      | Deletion*                        |                          | AMKL/TMD                                                                   | PMID: 17456055                                       |
|      |        | A                      | 593      | R                    | Nonpolar                         | Positive                 | AMKL/TMD                                                                   | PMID: 17456055                                       |
|      |        | A                      | 593      | T                    | Nonpolar                         | Polar                    | AMKL/TMD                                                                   | PMID: 17456055                                       |
|      |        | R                      | 657      | Q                    | Positive                         | Polar                    | T-PLL, AML, JMML, NKTCL                                                    | PMID: 24843152,<br>PMID: 24446122                    |
|      |        | R                      | 657      | H                    | Positive                         | Positive                 | T-PLL, AML, JMML, NKTCL                                                    | PMID: 24843152,<br>PMID: 24446122                    |
|      |        | R                      | 657      | W                    | Positive                         | Nonpolar                 | T-PLL, AML, JMML, NKTCL                                                    | PMID: 24843152,<br>PMID: 24446122                    |
|      |        | V                      | 674      | A                    | Nonpolar                         | Nonpolar                 | T-ALL                                                                      | PMID: 24446122,<br>PMID: 22425895,<br>PMID: 26446793 |

|      |        | V                   | 674      | F                 | Nonpolar                   | Nonpolar              | T-ALL                                                  | PMID: 24446122,<br>PMID: 22425895,<br>PMID: 26446793                    |
|------|--------|---------------------|----------|-------------------|----------------------------|-----------------------|--------------------------------------------------------|-------------------------------------------------------------------------|
|      |        | V                   | 678      | L                 | Nonpolar                   | Nonpolar              | T-ALL                                                  | PMID: 25193870,<br>PMID: 24446122                                       |
|      |        | V                   | 678      | M                 | Nonpolar                   | Nonpolar              | T-ALL                                                  | PMID: 25193870,<br>PMID: 24446122                                       |
|      |        | V                   | 722      | I                 | Nonpolar                   | Nonpolar              | AMKL, NKTCL                                            | PMID: 16843266,<br>PMID: 10982185                                       |
|      |        | V                   | 765      | D                 | Nonpolar                   | Negative              | JMML                                                   | PMID: 23832011                                                          |
|      | Linker | S                   | 789      | P                 | Polar                      | Nonpolar              | Childhood ALL                                          | PMID: 19470474,<br>PMID: 29046866                                       |
|      |        | Y                   | 824      | D                 | Nonpolar                   | Negative              | T-PLL                                                  | PMID: 24048415                                                          |
|      |        | L                   | 857      | Q                 | Nonpolar                   | Polar                 | T-ALL/T-PLL/JMML                                       | PMID: 25193870,<br>PMID: 26446793                                       |
|      |        | L                   | 857      | P                 | Nonpolar                   | Nonpolar              | T-ALL/T-PLL/JMML                                       | PMID: 25193870,<br>PMID: 26446793                                       |
|      |        | Q                   | 865      | E                 | Polar                      | Negative              | T-ALL                                                  | PMID: 26206799                                                          |
|      |        | P                   | 906      | S                 | Nonpolar                   | Polar                 | ALL                                                    | PMID: 26446793                                                          |
|      | JH1    | R                   | 918      | C                 | Positive                   | Polar                 | AML                                                    | PMID: 20400977,<br>PMID: 29046866                                       |
|      |        | R                   | 925      | S                 | Positive                   | Polar                 | T-ALL                                                  | PMID: 25193870                                                          |
|      |        | E                   | 958      | K                 | Negative                   | Positive              | T-ALL, JMML                                            | PMID: 26206799,<br>PMID: 26446793,<br>PMID: 23832011,<br>PMID: 26980750 |
|      |        | Q                   | 988      | P                 | Polar                      | Nonpolar              | T-ALL                                                  | PMID: 24367274                                                          |
|      |        | L                   | 1017     | M                 | Nonpolar                   | Nonpolar              | CML                                                    | PMID: 20400977                                                          |
|      |        | E                   | 1106     | G                 | Negative                   | Nonpolar              | T-ALL                                                  | PMID: 25193870                                                          |
| TYK2 | Region | Original Amino acid | Position | Amino acid Change | Original Amino acid nature | New Amino acid nature | Leukemia Subtype                                       | Reference                                                               |
|      |        | G                   | 36       | D                 | Nonpolar                   | Negative              | T-ALL (MOLT-16 cell line)                              | PMID: 23471820                                                          |
|      |        | S                   | 47       | N                 | Polar                      | Polar                 | T-ALL (MOLT-16 cell line)                              | PMID: 23471820                                                          |
|      | FERM   | G                   | 363      | S                 | Nonpolar                   | Polar                 | AML                                                    | PMID: 18270328                                                          |
|      |        | R                   | 425      | H                 | Positive                   | Positive              | T-ALL (MOLT-16 cell line)                              | PMID: 23471820                                                          |
|      |        | I                   | 684      | S                 | Nonpolar                   | Polar                 | T-ALL                                                  | PMID: 23471820                                                          |
|      |        | R                   | 703      | W                 | Positive                   | Nonpolar              | AML                                                    | PMID: 18270328                                                          |
|      | JH2    | V                   | 731      | I                 | Nonpolar                   | Nonpolar              | ALL (RPMI-8402 cell line)                              | PMID: 23471820                                                          |
|      |        | P                   | 760      | L                 | Nonpolar                   | Nonpolar              | ALL (germline)                                         | PMID: 27733777                                                          |
|      |        | G                   | 761      | V                 | Nonpolar                   | Nonpolar              | ALL (germline)                                         | PMID: 27733777                                                          |
|      |        | M                   | 926      | V                 | Nonpolar                   | Nonpolar              | Germline mutation in ALL, but probably not deleterious | PMID: 27733777                                                          |
|      |        | E                   | 957      | D                 | Negative                   | Negative              | ALL (MOLT-4 cell line)                                 | PMID: 23471820                                                          |
|      | JH1    | A                   | 1016     | S                 | Nonpolar                   | Polar                 | AML                                                    | PMID: 18270328                                                          |
|      |        | R                   | 1027     | H                 | Positive                   | Positive              | ALL (MOLT-16 and CCRF-CEM cell lines)                  | PMID: 23471820                                                          |

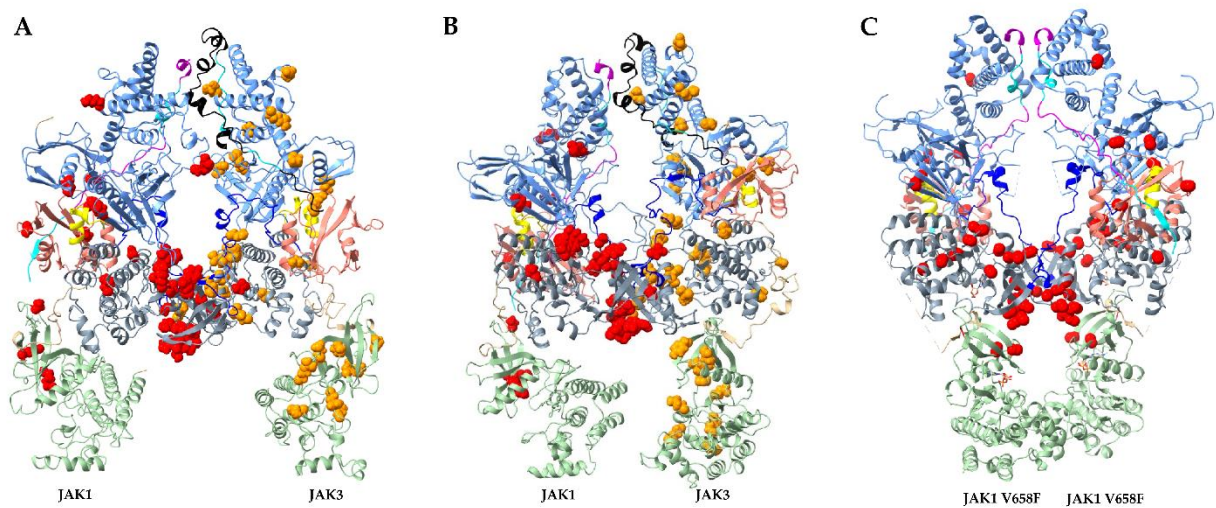

**Figure S1.** Comparison of SWISS-MODEL and AlphaFold2 JAK1-JAK3 dimer structures. JAK FERM domain (light blue), FERM-SH2 linker (yellow), SH2 domain (pink), SH2-JH2 linker (royal blue), JH2 domain (gray), JH2-JH1 linker (beige), JH1 domain (green). JAK1 and JAK3 residues, red and orange spheres respectively, related to hematologic malignancies are shown. A) SWISS-MODEL structure obtained using PDB 7T6F for both JAK1 and JAK3. B) AlphaFold2 Multimer V3 model obtained using PDB 7T6F as a template. C) Published structure of JAK1 V658F (PDB 8EWY) homodimer in transactivation process.
